# Supplementary material for: Maltodextrin-induced intestinal injury in a neonatal mouse model
Source: Oxford University Press journal article supplement (doi:10.1242/dmm.044776), 2020-01-01
Supplement: dmm044776supp.pdf [file dmm044776supp.pdf]

**Table S1. Fold-change in cytokine expression in the maltodextrin-hypoxia (MH) group relative to the control, dam fed (D) group at day 1 and at day 4 of the intestinal injury model.**

| Cytokines     | Day 1 | <i>P</i> | Day 4 | <i>P</i> | Day 1 to Day 4 description of temporal change |
|---------------|-------|----------|-------|----------|-----------------------------------------------|
|               | MH/D  |          | MH/D  |          |                                               |
| IFN $\gamma$  | -3.0  | 0.01     | +2.6  | ns       | Acute decrease with resolution                |
| IL-17A        | +883  | <0.001   | +1.0  | ns       | Acute increase with resolution                |
| IL-1 $\beta$  | +3.5  | <0.001   | -0.8  | ns       | Acute increase with resolution                |
| KC/GRO        | +14.0 | <0.001   | +1.5  | ns       | Acute increase with resolution                |
| IL-4          | +1.1  | ns       | -0.2  | <0.01    | Acute increase with resolution                |
| TNF- $\alpha$ | +15.3 | <0.001   | -0.6  | <0.01    | Acute increase with resolution                |
| IL-23         | +1.5  | ns       | +1.1  | ns       | No change                                     |
| IL-6          | +10.5 | 0.02     | +20.0 | <0.01    | Persistent elevation                          |

Data shown as mean fold change in the MH group relative to the D group. Wilcoxon rank sum tests were performed comparing expression levels of the MH group relative to the D group at Day 1 and at Day 4. Statistical significance threshold set at  $P < 0.05$ . Description of temporal change from day 1 to day 4 was assigned as follows: “acute decrease with resolution” if a negative fold change difference existed at day 1 but not at day 4; “acute increase with resolution” if a positive fold change difference existed at day 1 but not at day 4; “no change” if both day 1 and day 4 fold changes revealed no significant differences; and, “persistent elevation” if a positive fold change existed at both day 1 and day 4. Number of animals per group was  $n=10$  for D and MH on day 1 and  $n=16$  for D and MH on day 4. D = dam fed; MH = mice fed maltodextrin and subjected to hypoxia.

**Table S2. Nutritional composition of Maltodextrin and Lactose containing human infant formula (per 100 cal)<sup>1</sup>.**

| <b>Nutrients</b>               | <b>Lactose-dominant<br/>Infant formula<br/>(L)</b> | <b>Maltodextrin-<br/>containing<br/>Infant formula<br/>(M30)</b>                                      | <b>Maltodextrin-<br/>containing<br/>Infant formula<br/>(M70)</b>                                      | <b>Maltodextrin-<br/>containing<br/>Infant formula<br/>(M90)</b>                                               | <b>Maltodextrin-<br/>containing<br/>Infant formula<br/>(M)<sup>2</sup></b>                                                        |
|--------------------------------|----------------------------------------------------|-------------------------------------------------------------------------------------------------------|-------------------------------------------------------------------------------------------------------|----------------------------------------------------------------------------------------------------------------|-----------------------------------------------------------------------------------------------------------------------------------|
| Volume, ml                     | 150                                                | 148                                                                                                   | 148                                                                                                   | 148                                                                                                            | 148                                                                                                                               |
| Protein, g                     | 2.1                                                | 2.2                                                                                                   | 2.2                                                                                                   | 2.6                                                                                                            | 2.5                                                                                                                               |
| Protein source                 | whey                                               | whey                                                                                                  | whey                                                                                                  | whey                                                                                                           | soy                                                                                                                               |
| Fat, g                         | 5.6                                                | 5.1                                                                                                   | 5.1                                                                                                   | 5.1                                                                                                            | 5.1                                                                                                                               |
| Fat source                     | high oleic safflower oil,<br>soy oil, coconut oil  | palm olein oil, soy oil,<br>coconut oil, high oleic<br>safflower or sunflower<br>oil, single cell oil | palm olein oil, soy oil,<br>coconut oil, high oleic<br>safflower or sunflower<br>oil, single cell oil | MCT oil, soy oil, high<br>oleic sunflower oil,<br>high 2-palmitic<br>vegetable oil, CITREM,<br>single cell oil | palm olein oil, soy oil,<br>coconut oil, high oleic<br>acid, soy oil, coconut oil,<br>palm oil, sunflower oil,<br>single cell oil |
| Carbohydrate, g                | 10.7                                               | 11.2                                                                                                  | 11.2                                                                                                  | 10.9                                                                                                           | 11.1                                                                                                                              |
| Carbohydrate<br>source         | 94% lactose,<br>6%<br>galactooligosaccharides      | 70% lactose, 30%<br>maltodextrin                                                                      | 30% lactose, 70%<br>maltodextrin                                                                      | 10% potato starch, 90%<br>maltodextrin                                                                         | 79% maltodextrin, 21 %<br>sucrose                                                                                                 |
| Water, g                       | 141                                                | 134                                                                                                   | 131                                                                                                   | 133                                                                                                            | 134                                                                                                                               |
| Linoleic Acid, mg              | 1000                                               | 900                                                                                                   | 900                                                                                                   | 777                                                                                                            | 920                                                                                                                               |
| Vitamin A, IU                  | 300                                                | 300                                                                                                   | 300                                                                                                   | 300                                                                                                            | 300                                                                                                                               |
| Vitamin D, IU                  | 75                                                 | 75                                                                                                    | 60                                                                                                    | 45                                                                                                             | 60                                                                                                                                |
| Vitamin E, IU                  | 1.5                                                | 2.0                                                                                                   | 2.0                                                                                                   | 2.0                                                                                                            | 2.0                                                                                                                               |
| Vitamin K, mcg                 | 8                                                  | 8                                                                                                     | 8                                                                                                     | 10                                                                                                             | 9                                                                                                                                 |
| Thiamin (Vitamin<br>B1), µg    | 100                                                | 100                                                                                                   | 100                                                                                                   | 73                                                                                                             | 80                                                                                                                                |
| Riboflavin<br>(Vitamin B2), µg | 160                                                | 140                                                                                                   | 140                                                                                                   | 152                                                                                                            | 94                                                                                                                                |

|                           |      |      |      |      |      |
|---------------------------|------|------|------|------|------|
| Vitamin B6, µg            | 63   | 75   | 75   | 79   | 60   |
| Vitamin B12, µg           | 0.26 | 0.30 | 0.30 | 0.30 | 0.33 |
| Niacin, µg                | 1100 | 1050 | 1050 | 1028 | 1050 |
| Folic acid, µg            | 16   | 15   | 15   | 15   | 16   |
| Pantothenic acid, µg      | 470  | 450  | 450  | 730  | 500  |
| Biotin, µg                | 4.6  | 4.4  | 4.4  | 2.0  | 5.0  |
| Vitamin C, mg             | 9    | 10   | 10   | 15   | 12   |
| Choline, µg               | 24   | 24   | 24   | 24   | 24   |
| Inositol, mg              | 4.9  | 6    | 6    | 20   | 6    |
| Calcium, mg               | 82   | 67   | 72   | 90   | 105  |
| Phosphorus, mg            | 44   | 38   | 40   | 63   | 63   |
| Magnesium, mg             | 6    | 7    | 7    | 9    | 11   |
| Iron, mg                  | 1.9  | 1.5  | 1.5  | 1.8  | 1.8  |
| Zinc, mg                  | 0.79 | 0.8  | 0.8  | 1.0  | 0.9  |
| Manganese, µg             | 5    | 15   | 15   | 7    | 25   |
| Copper, µg                | 95   | 80   | 80   | 98   | 80   |
| Iodine, µg                | 6    | 12   | 12   | 15   | 15   |
| Selenium, µg              | 2    | 3    | 3    | 2    | 3    |
| Sodium, mg                | 25   | 27   | 27   | 38   | 40   |
| Potassium, mg             | 110  | 108  | 108  | 98   | 116  |
| Chloride, mg              | 68   | 65   | 65   | 79   | 70   |
| Osmolality, mOsm/kg water | 310  | 250  | 195  | 220  | 180  |

<sup>1</sup>Data was obtained from commercial product label.

<sup>2</sup>Main study diet

## Figure S1

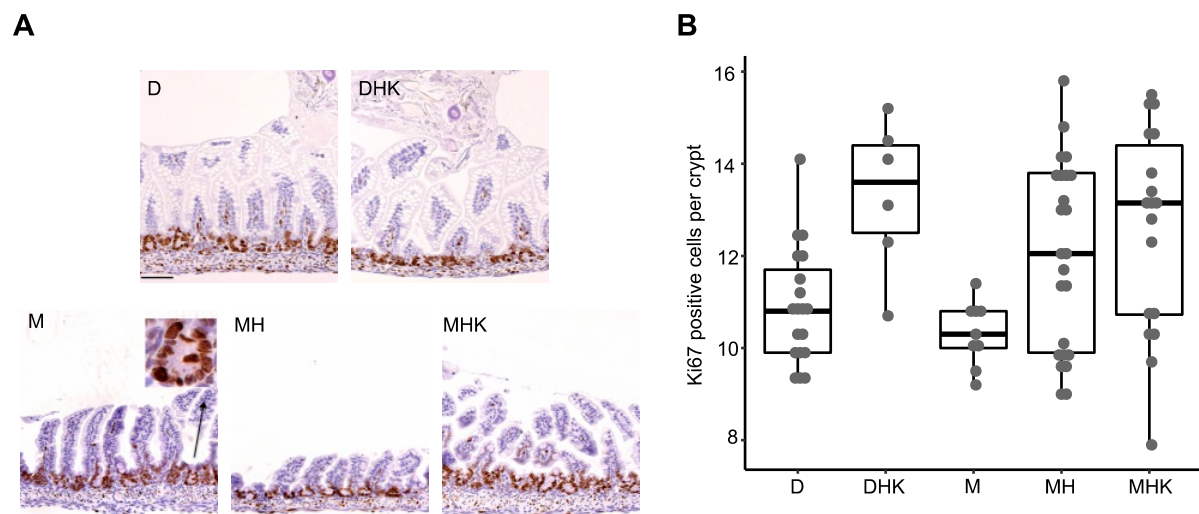

**Fig. S1. Effect of maltodextrin containing formula on crypt cell proliferation.** A) Representative images (200x, scale bar: 50 μm) of ileal sections immunostained for the proliferation marker Ki67. B) Quantification of Ki67 positive cells per crypt presented as a box dot plots showing median and IQR. D = dam fed, n=19; DHK = dam fed mice administered *Klebsiella pneumoniae* (K) by oral gavage and subjected to hypoxia (H), n=6; M = mice fed a human infant formula containing maltodextrin as a major carbohydrate source alone, n=9; MH = mice fed maltodextrin containing infant formula and subjected to hypoxia, n=24; MHK = mice fed maltodextrin containing infant formula along with *Klebsiella pneumoniae* and subjected to hypoxia, n=18.

**Figure S2**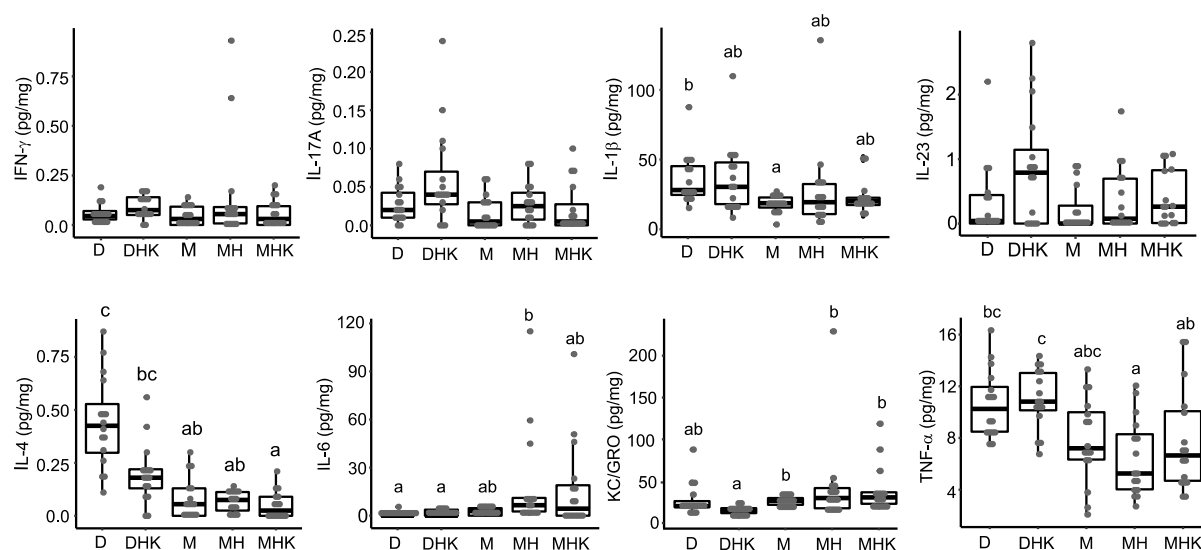

**Fig. S2. Effect of maltodextrin containing formula feeding on intestinal cytokine production on day 4.** Cytokines (IFN- $\gamma$ , IL-17A, IL-1 $\beta$ , IL-23, IL-4, IL-6, KC/GRO and TNF- $\alpha$ ) levels are presented as a box dot plots showing median and IQR. Labeled points without a common letter represent statistically significant differences,  $P < 0.05$ . n=16 mice used in each group, D = dam fed; DHK = dam fed administered *Klebsiella pneumoniae* (K) by oral gavage and subjected to hypoxia (H); M = mice fed a human formula containing maltodextrin as a major carbohydrate source alone, n=9; MH = mice fed maltodextrin infant formula and subjected to hypoxia; MHK = mice fed maltodextrin containing infant formula along with *Klebsiella pneumoniae* and subjected to hypoxia.

**Figure S3**

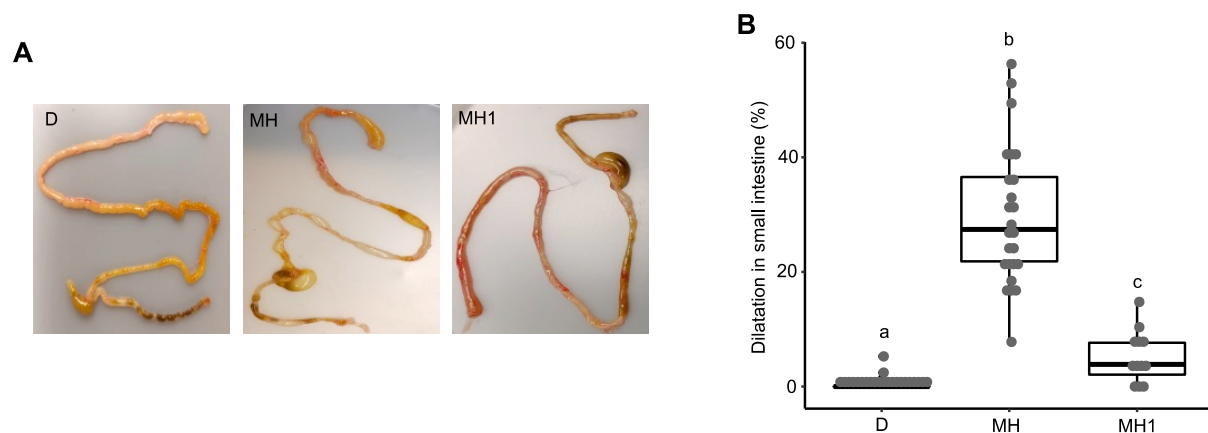

**Fig. S3. Maltodextrin containing formula feeding results in increased dilatation in the small intestine in young mice (5-6 day old, MH) compared to controls and older mice (9-10 day old, MH1).** A) Representative images of gross morphological changes in the small and large intestine from groups D, MH and MH1. B) Percent dilatation in the small intestine presented as box dot plots of median and IQR. Labeled points without a common letter represents statistically significant differences,  $P<0.05$ , D = 5-6 day old mice dam fed,  $n=23$ ; MH = 5-6 day old mice fed maltodextrin containing infant formula and subjected to hypoxia,  $n=25$ ; MH1 = 9-10 day old mice fed maltodextrin containing infant formula and subjected to hypoxia,  $n=12$ .

**Figure S4**

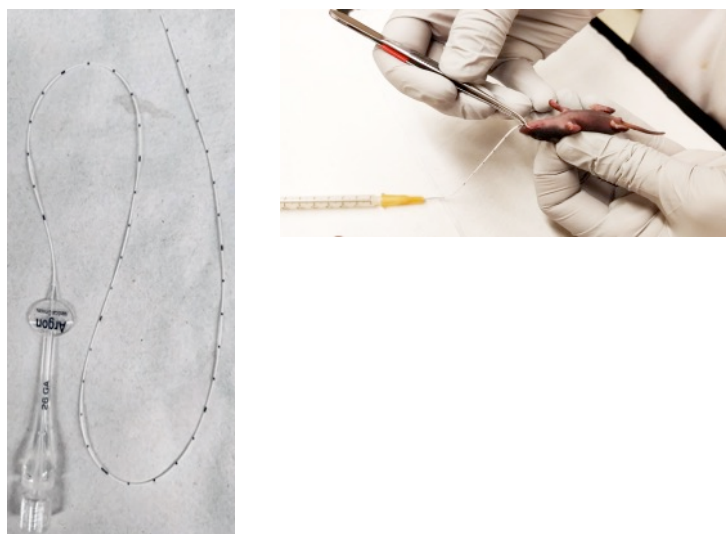

**Fig. S4. Catheter-based feeding for oral gavage.** Oral gavage is performed with a peripherally inserted central catheter (PICC line, 1.9F silastic catheter, Argon Medical Devices, Frisco, Texas) inserted to a depth of 2.0 cm in mouse pups.
